# Supplementary material for: Leveraging heterogeneity across multiple datasets increases cell-mixture deconvolution accuracy and reduces biological and technical biases
Source: PubMed Central journal article supplement (PMC6226523; doi:10.1038/s41467-018-07242-6), 2018-11-09
Supplement: 41467_2018_7242_MOESM1_ESM.pdf [file 41467_2018_7242_MOESM1_ESM.pdf]

Leveraging heterogeneity across multiple datasets increases cell-mixture deconvolution accuracy and reduces biological and technical biases

Supplementary Information

# Supplementary Figure 1

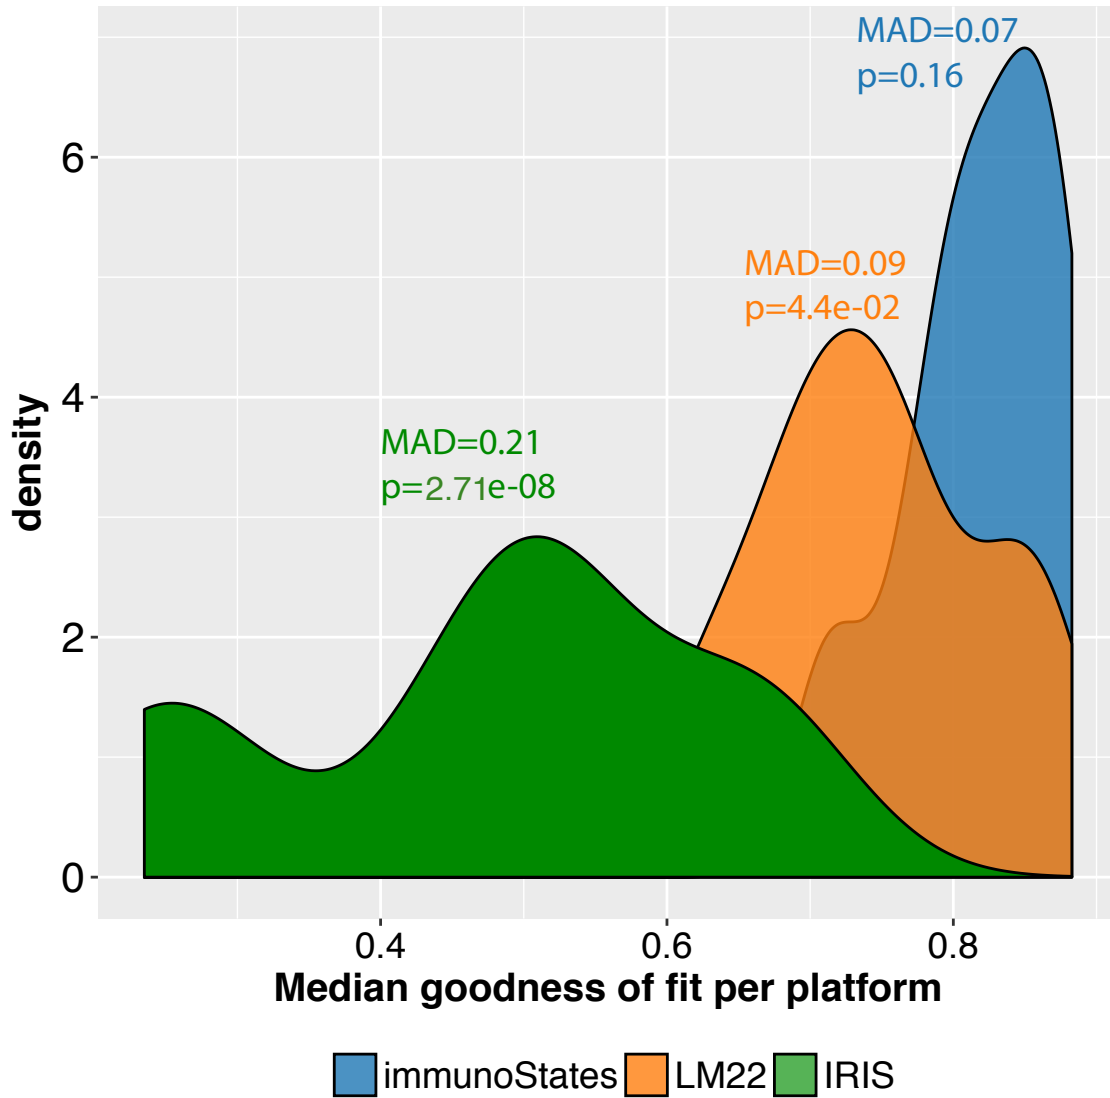

**Platform bias in cell mixture deconvolution.** Density plots representing the distribution of median goodness of fit for each platform across all methods grouped by different matrices (represented by fill color). Significance of platform bias is computed by estimating the Median Absolute Distance (MAD) of each distribution and comparing it to a null distribution that assumes no technical variation between samples.

## Supplementary Figure 2

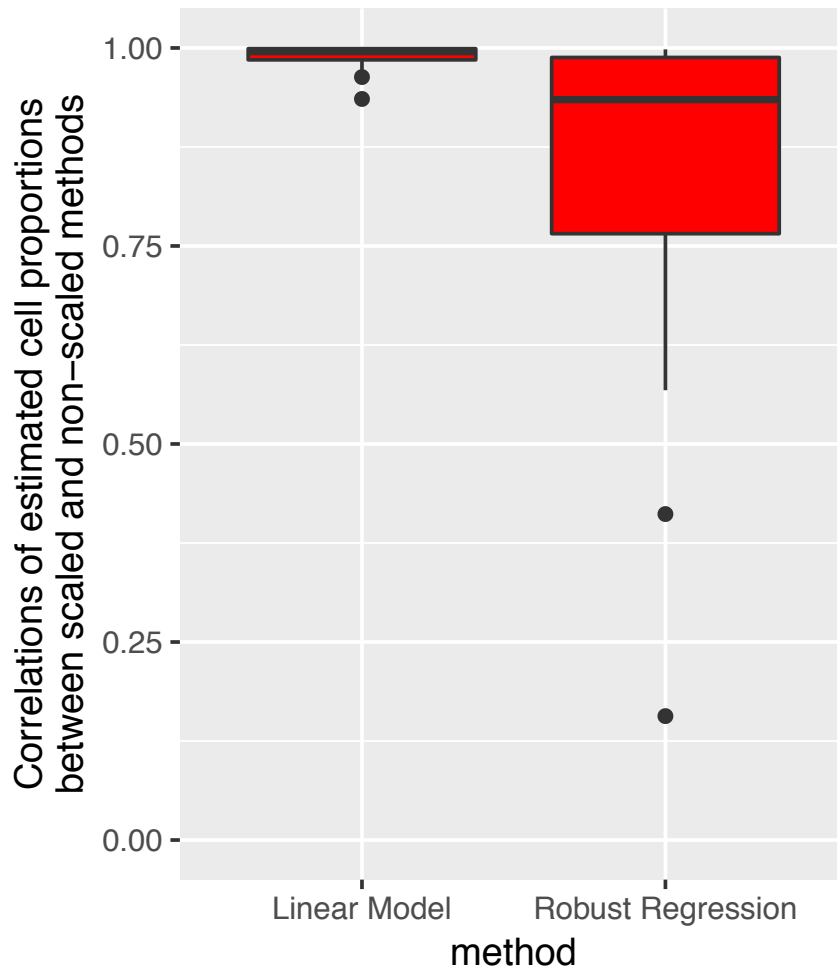

**Effect of rescaling expression data to deconvolution.** Boxplot displaying sample-level correlation between cell proportions estimated deconvolution with and without rescaling by either Linear Model ( $r = 0.989 \pm 0.002$ ) or Robust Regression ( $r = 0.843 \pm 0.034$ ) across multiple samples and basis matrices. Center lines correspond to the median value of each box and the lower and upper bounds of each box correspond to their first and the third quartiles, respectively.

# Supplementary Figure 3

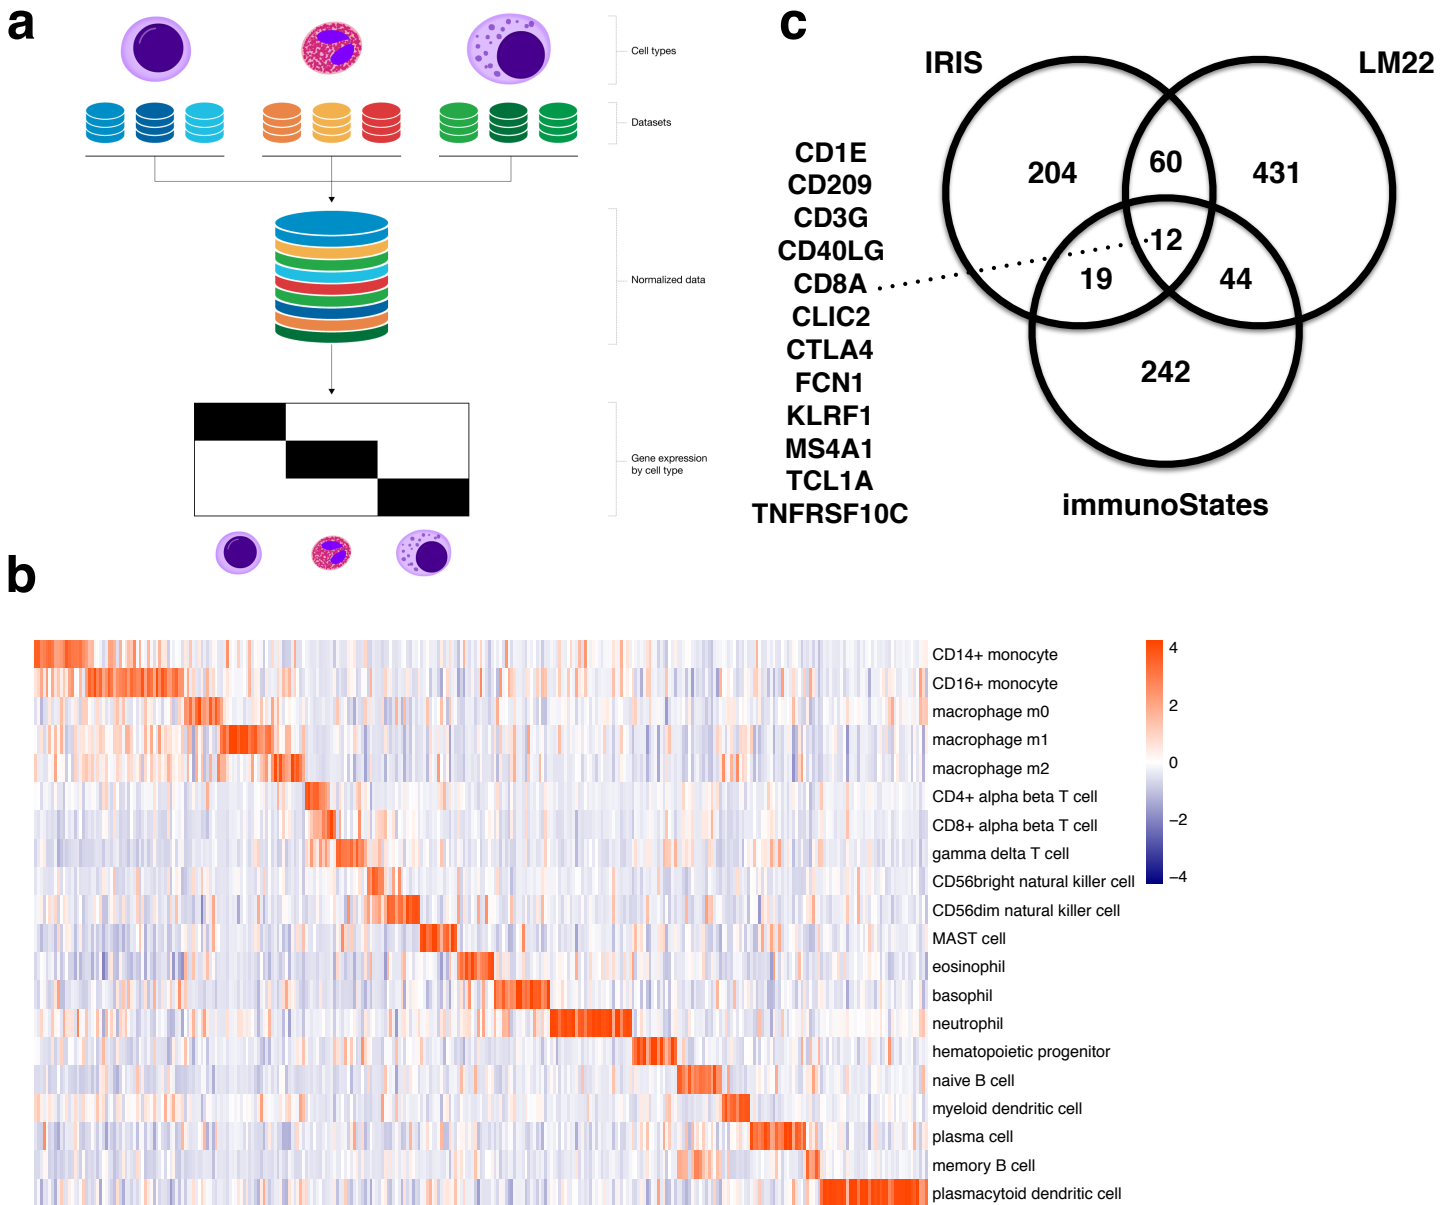

**Creation of the immunoStates matrix.** (a) Flow-chart describing the steps for the creation of the immunoStates expression matrix. (b) Heatmap showing expression of the immunoStates signature genes in target cell types. Genes expression values are displayed as z-scores per gene across all cell types. (c) Venn-diagram depicting the overlap between gene-sets between each basis matrix. Genes overlapping across all three matrices are listed on the left side of the diagram.

# Supplementary Figure 4

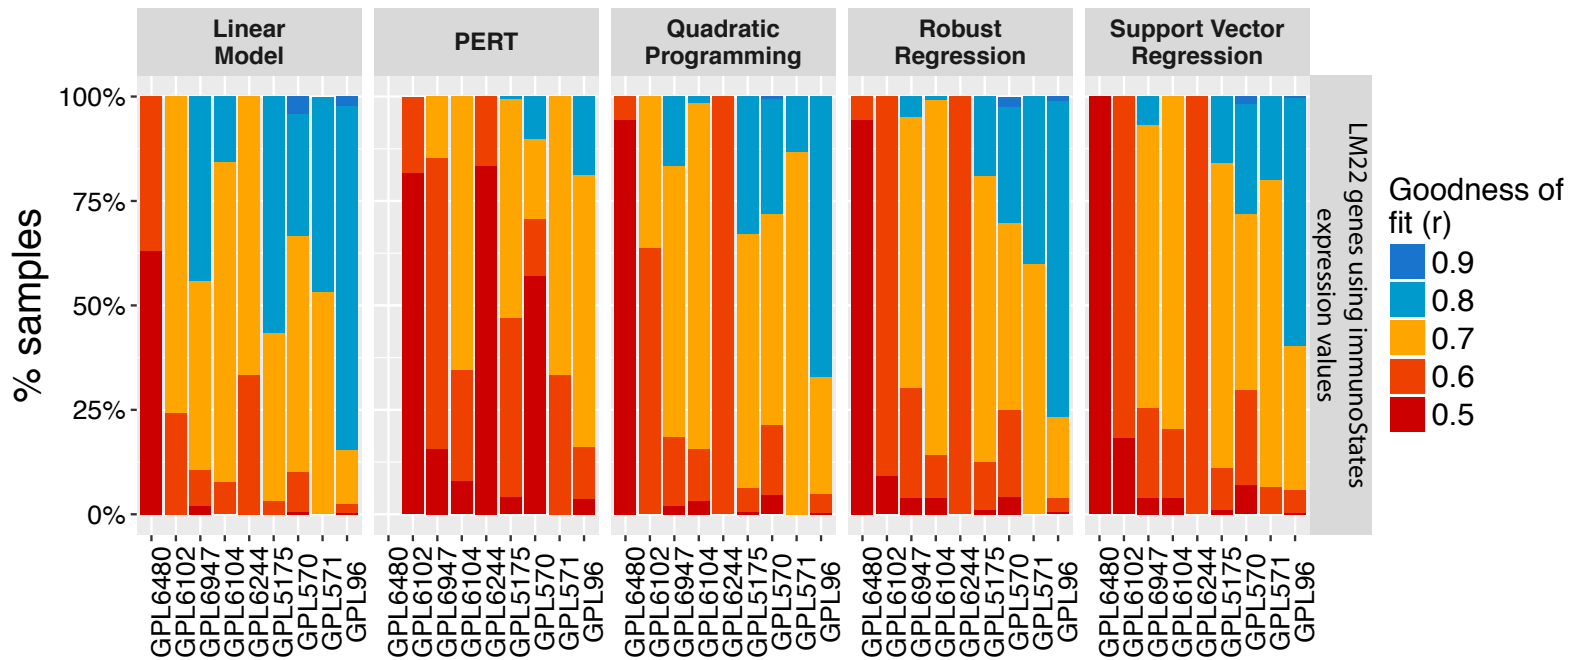

**Increasing the amount of data to estimate expression values for genes in a basis matrix does not improve deconvolution accuracy.** We used the datasets used to create immunoStates to calculate expression values for each gene in LM22, and deconvolved the technical bias evaluation cohort. We found increasing the amount of data to estimate expression value of a gene in a basis matrix did not increase accuracy.

# Supplementary Figure 5

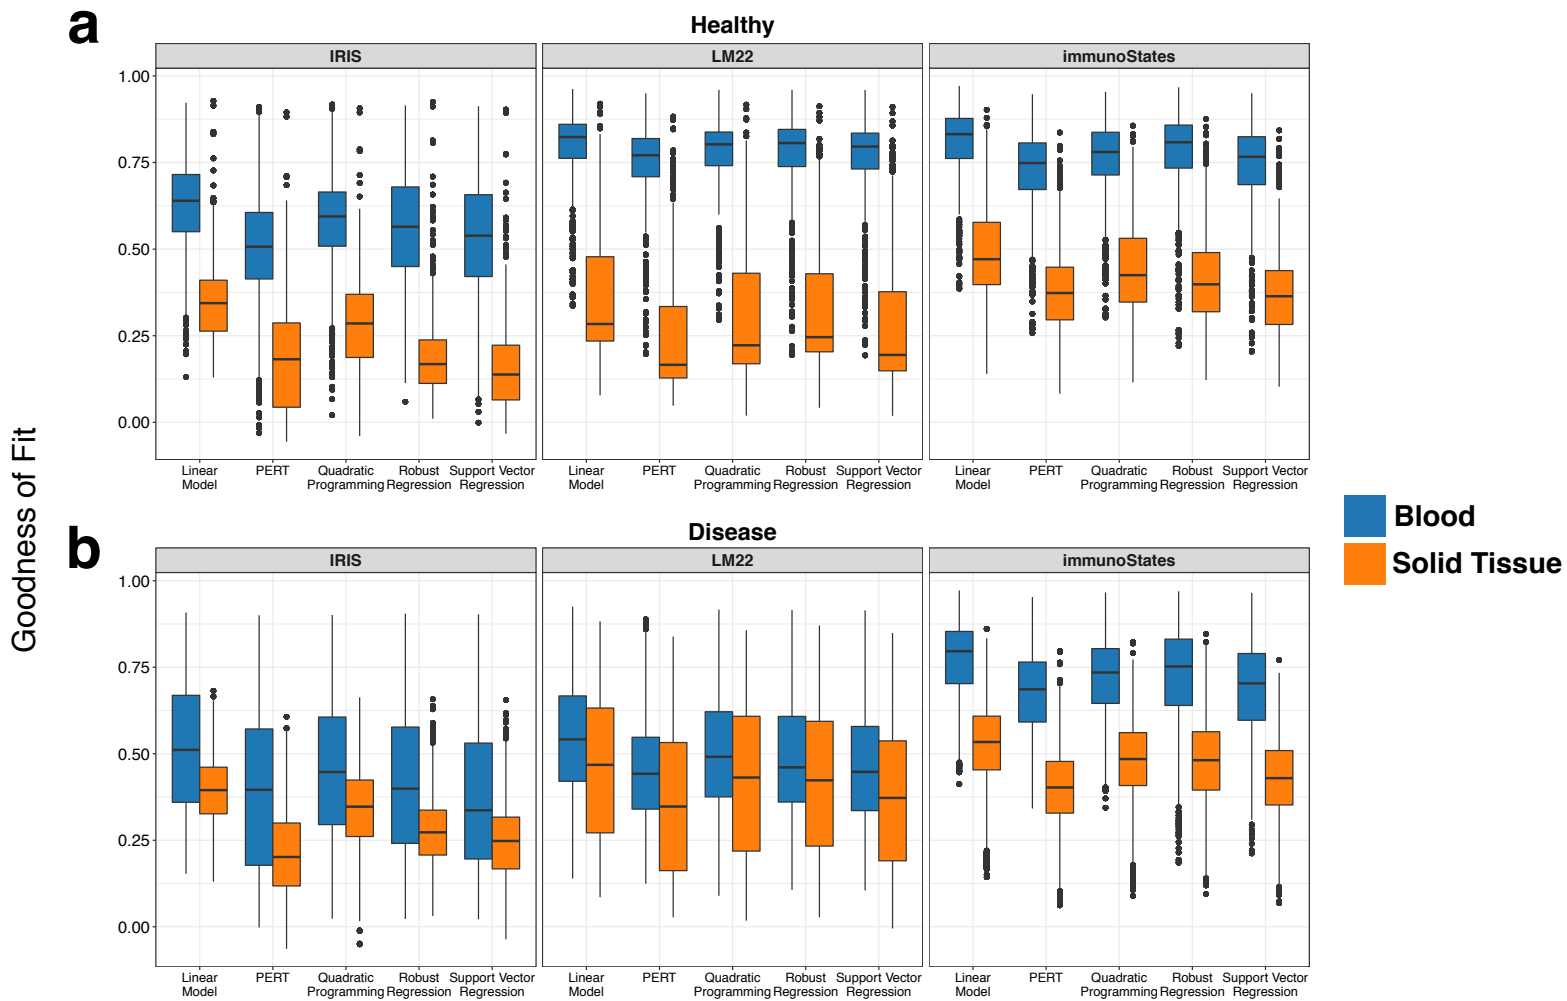

**Goodness of fit in healthy and diseased samples.** (a) Boxplots indicating goodness of fit scores (y-axis) for blood-derived and tissue-derived samples in healthy donors (1383 samples) across multiple deconvolution methods (x-axis) for IRIS, LM22, and immunoStates. Center lines correspond to the median value of each box and the lower and upper bounds of each box correspond to their first and the third quartiles, respectively. (b) Same as in (a) but in disease samples (2684 samples).

## Supplementary Figure 6

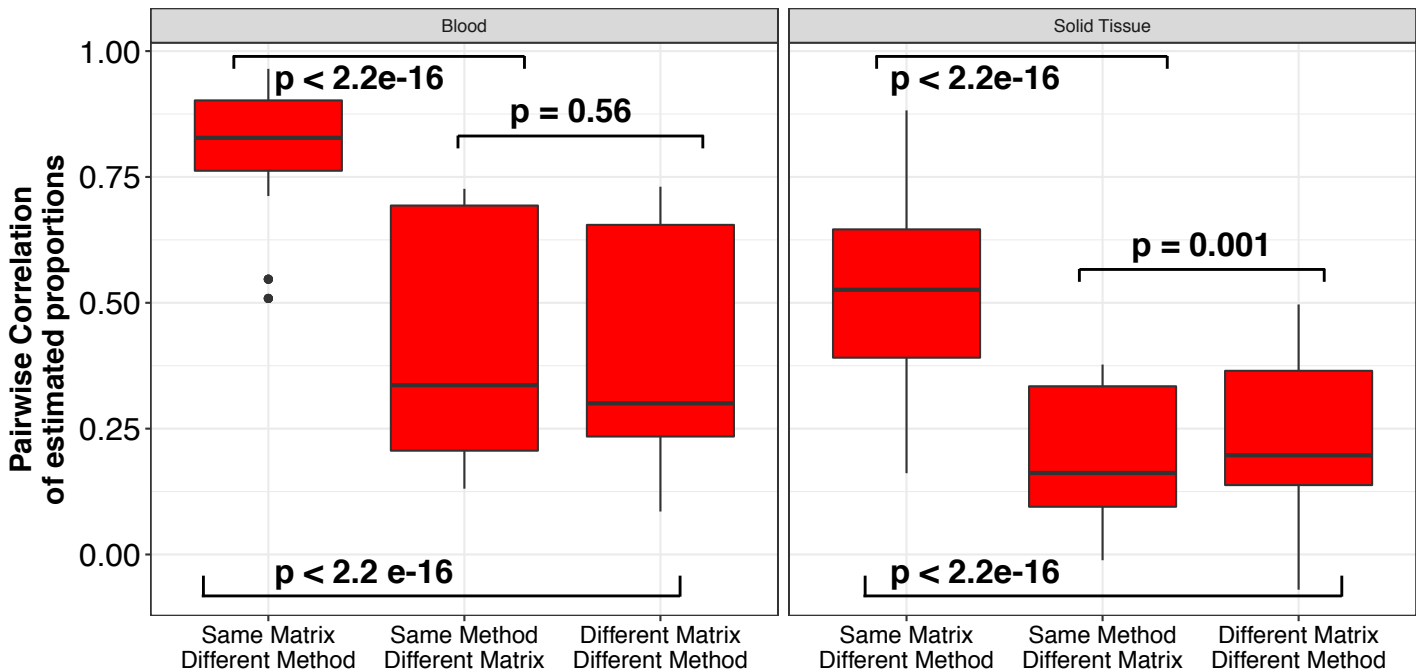

**Deconvolution concordance by matrix and method across blood and solid tissue.** Boxplots representing the distribution of pairwise correlation coefficients between estimated proportions for all matrices and deconvolution methods. Comparisons were divided in (1) pairs with the same signature matrix but run with different methods, (2) pairs with different signature matrices but run using the same method, and (3) pairs where both matrix and method were different. Significance analysis was performed using the Wilcoxon's paired rank sum test. Results are shown for samples containing blood cells or solid tissue biopsy from Lukk *et al* 2010.

# Supplementary Figure 7

GSE65133

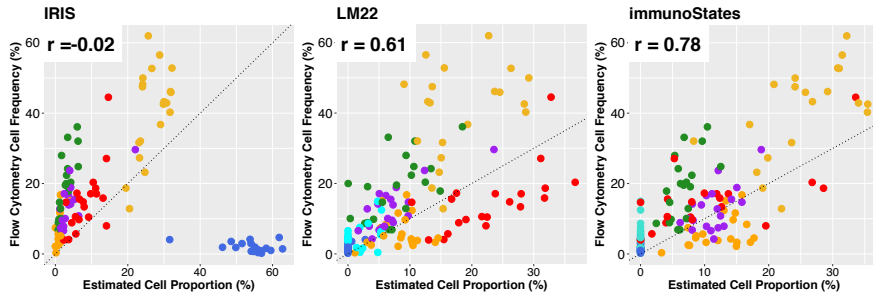

Linear Model

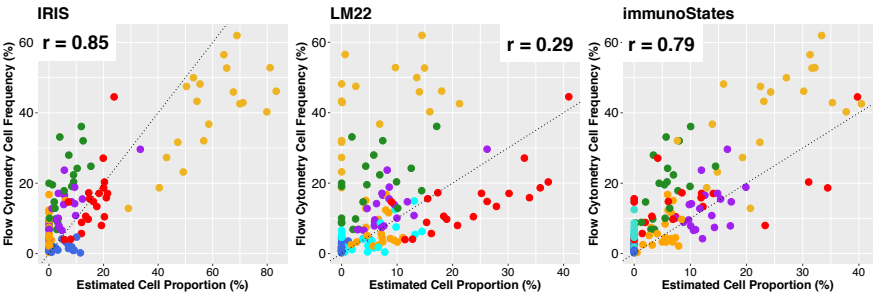

Quadratic Programming

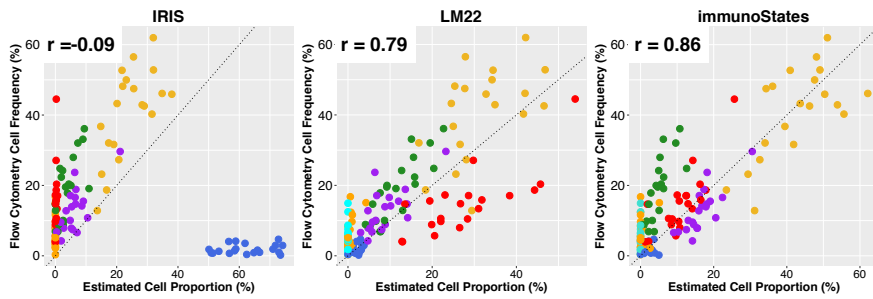

Robust Regression

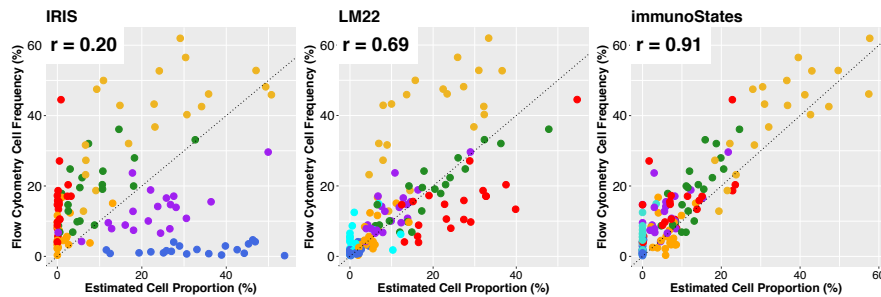

Support Vector Regression

- CD14+ Monocyte
- CD4+ T-Cell
- CD8+ T-Cell
- Gamma/Delta T-Cell
- memory B-Cell
- naïve B-Cell
- NK



# Supplementary Figure 8

GSE59654

Linear Model

Quadratic Programming

Robust Regression

Support Vector Regression

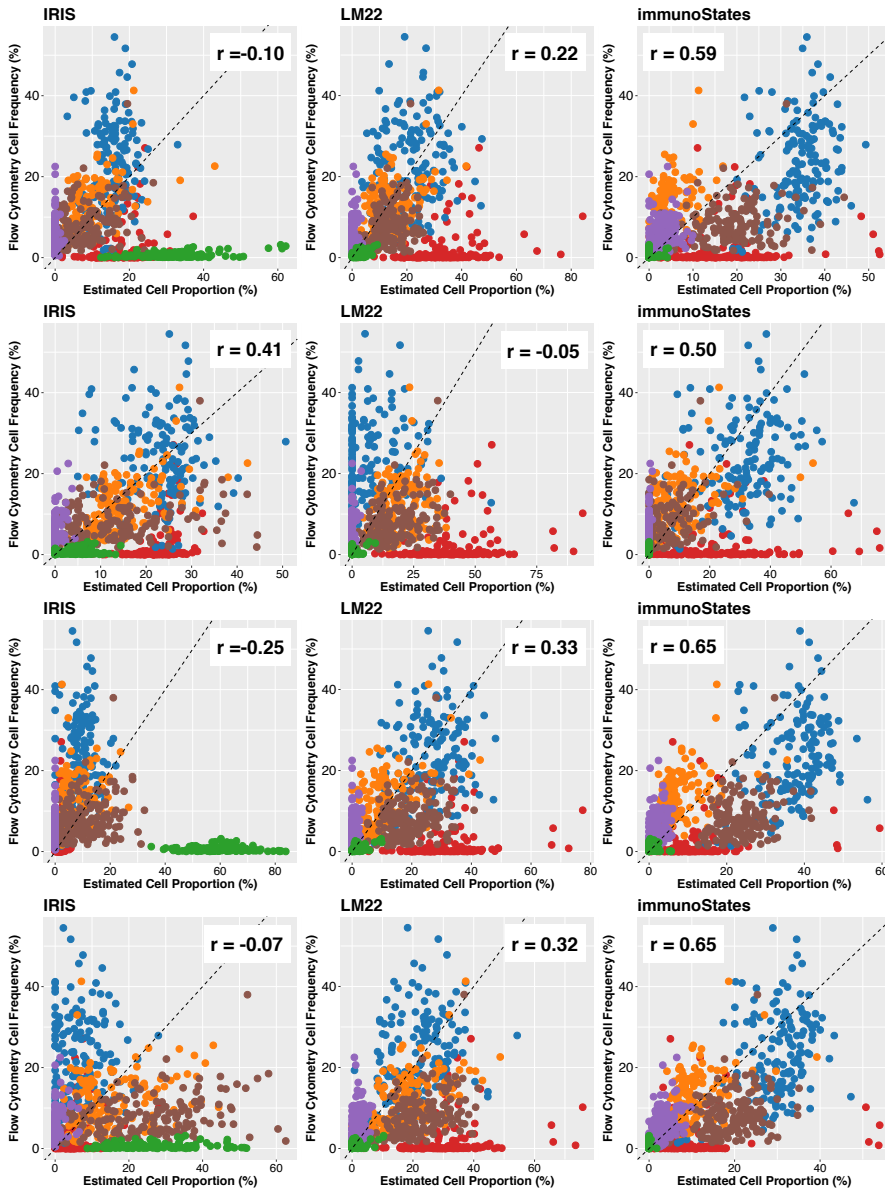

- CD14+ Monocyte
- CD4+ T-Cell
- CD8+ T-Cell
- memory B-Cell
- naïve B-Cell
- NK

# Supplementary Figure 9

Stanford-Ellison  
2011

Linear  
Model

Quadratic  
Programming

Robust  
Regression

Support Vector  
Regression

- PMNs
- Lymphocytes
- Monocytes

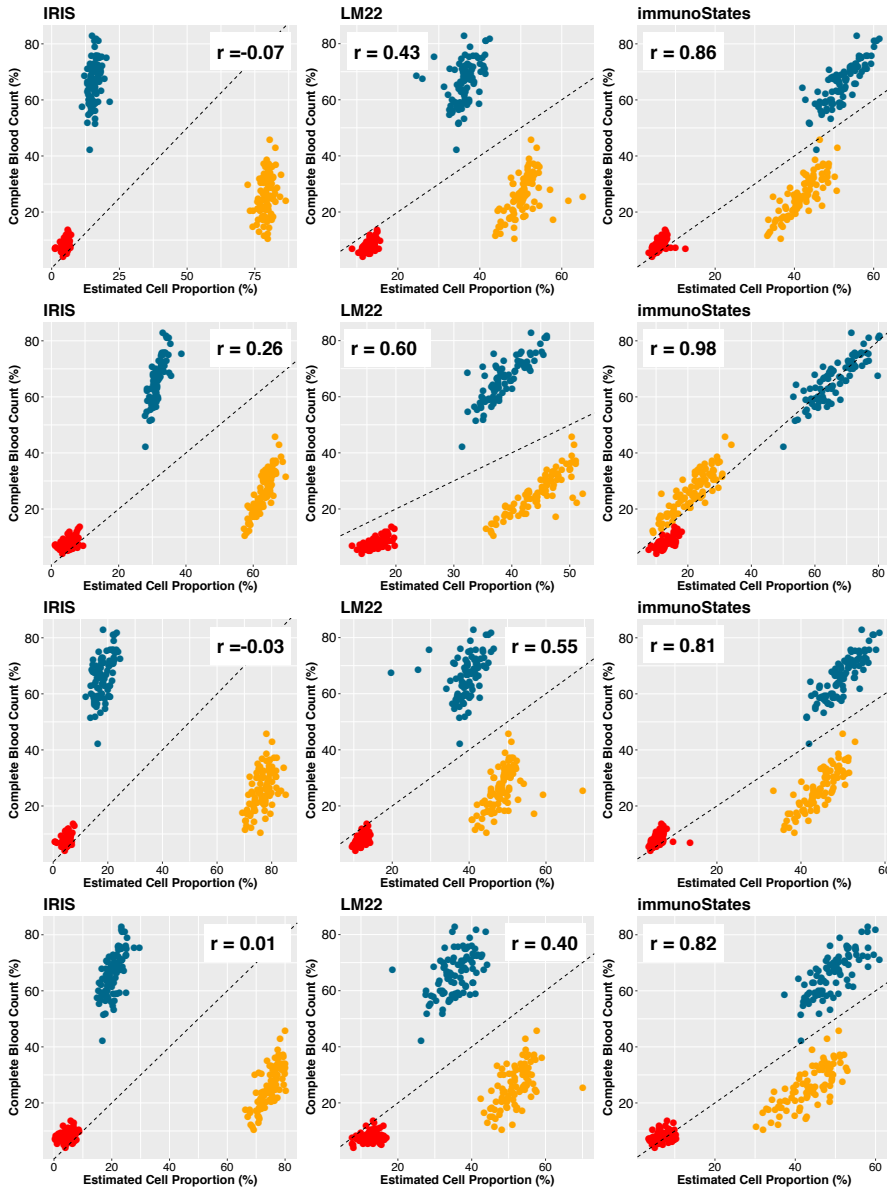

# Supplementary Figure 10

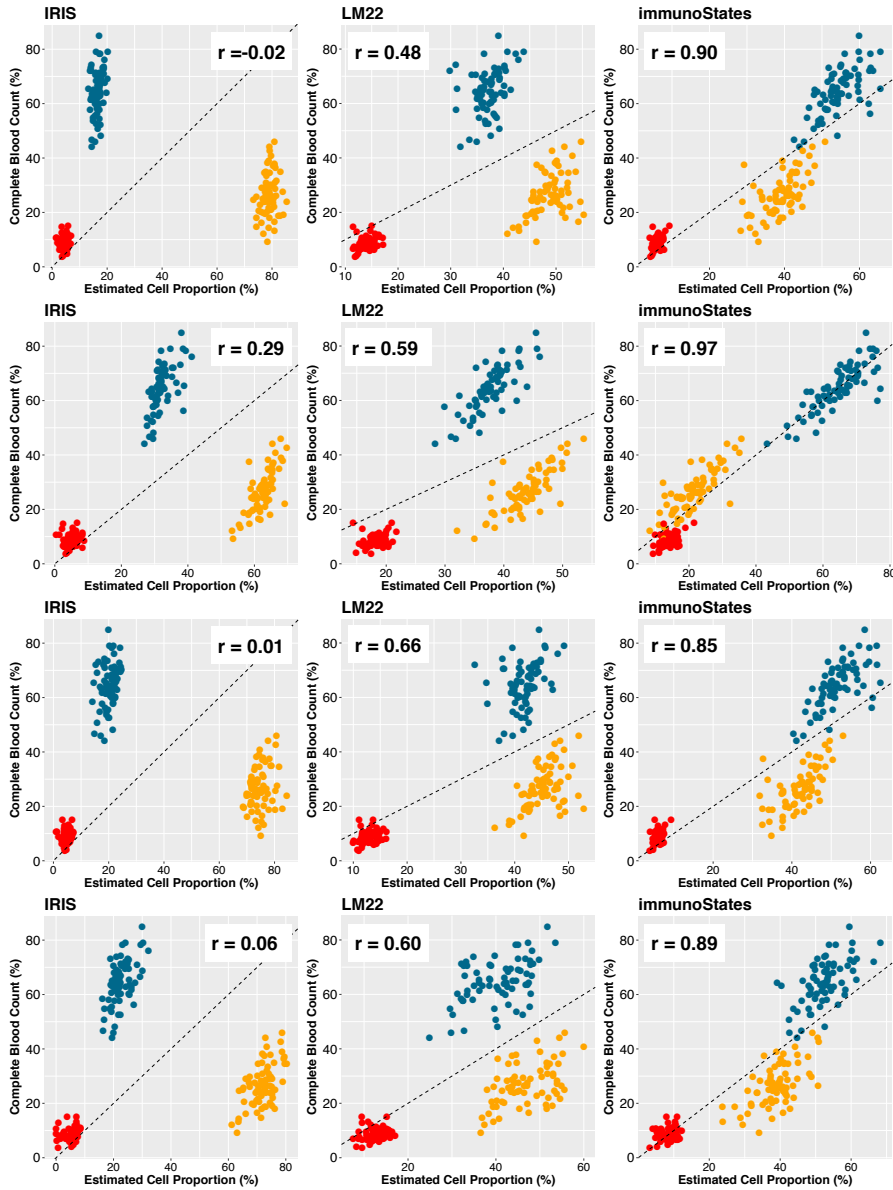

**Stanford-Ellison  
2012**

**Linear  
Model**

**Quadratic  
Programming**

**Robust  
Regression**

**Support Vector  
Regression**

- PMNs
- Lymphocytes
- Monocytes

# Supplementary Figure 11

Stanford-Ellison  
2013

Linear  
Model

Quadratic  
Programming

Robust  
Regression

Support Vector  
Regression

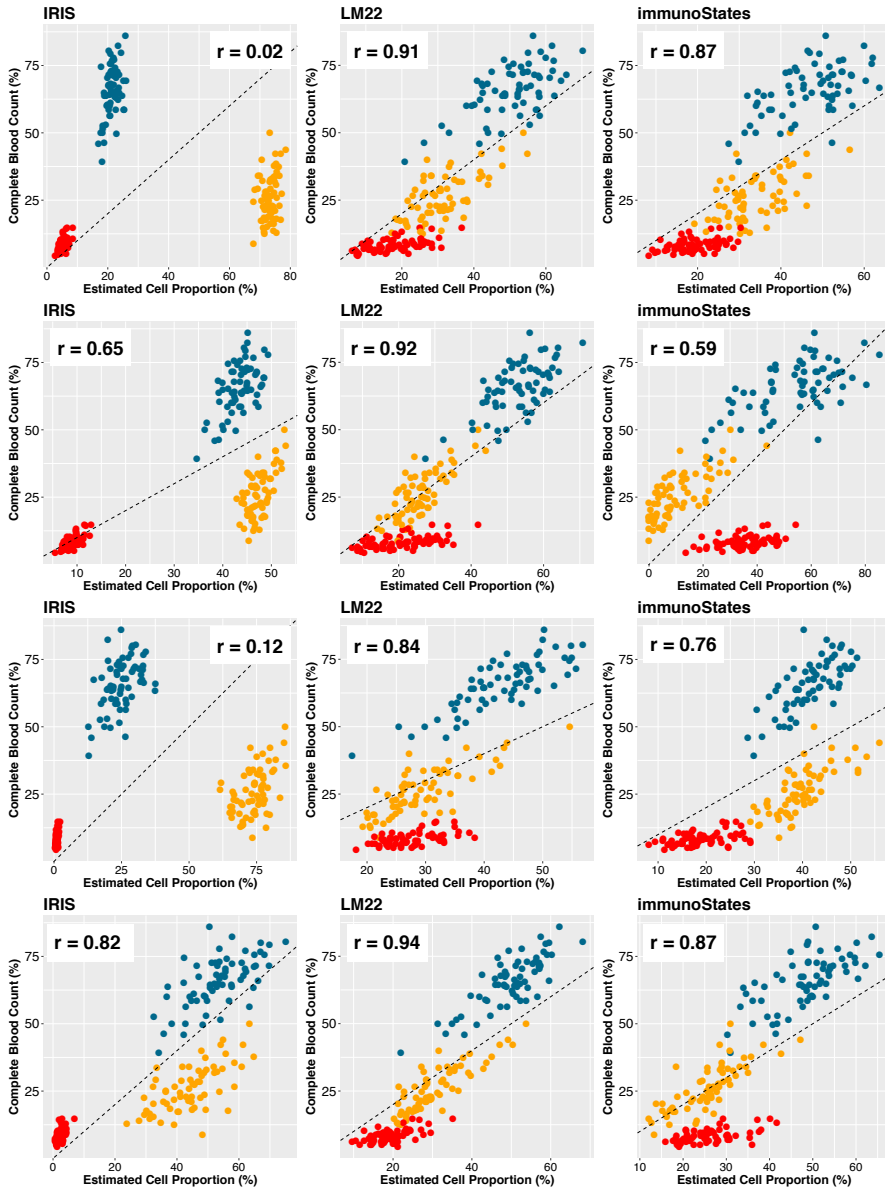

- PMNs
- Lymphocytes
- Monocytes

# Supplementary Figure 12

**GSE65133**  
**PERT**

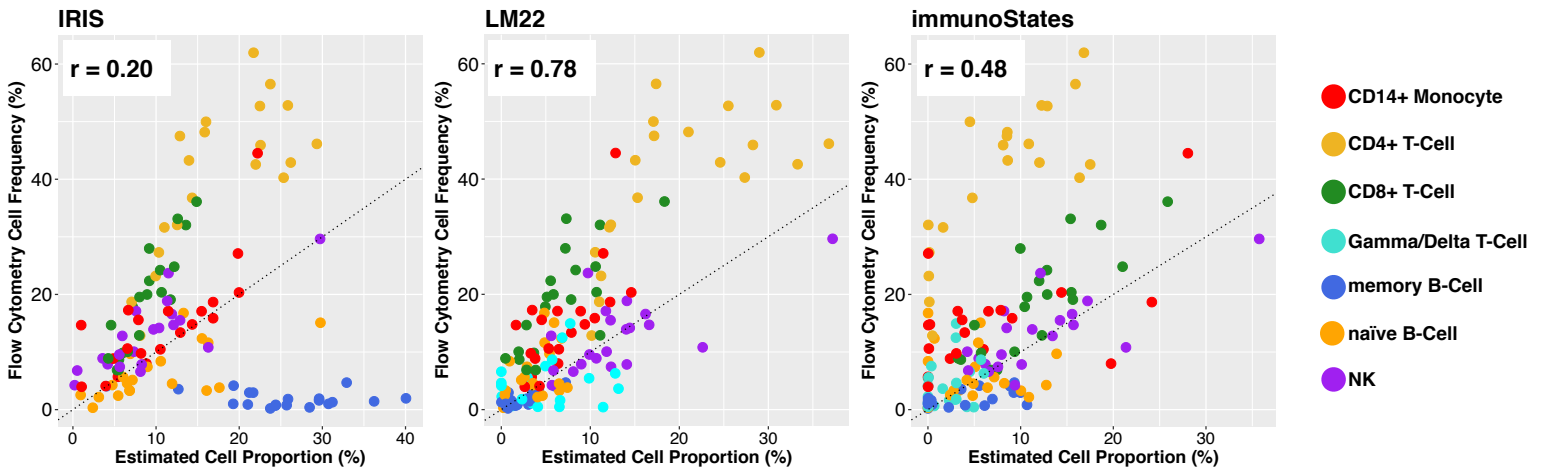

# Supplementary Figure 13

**GSE59654  
PERT**

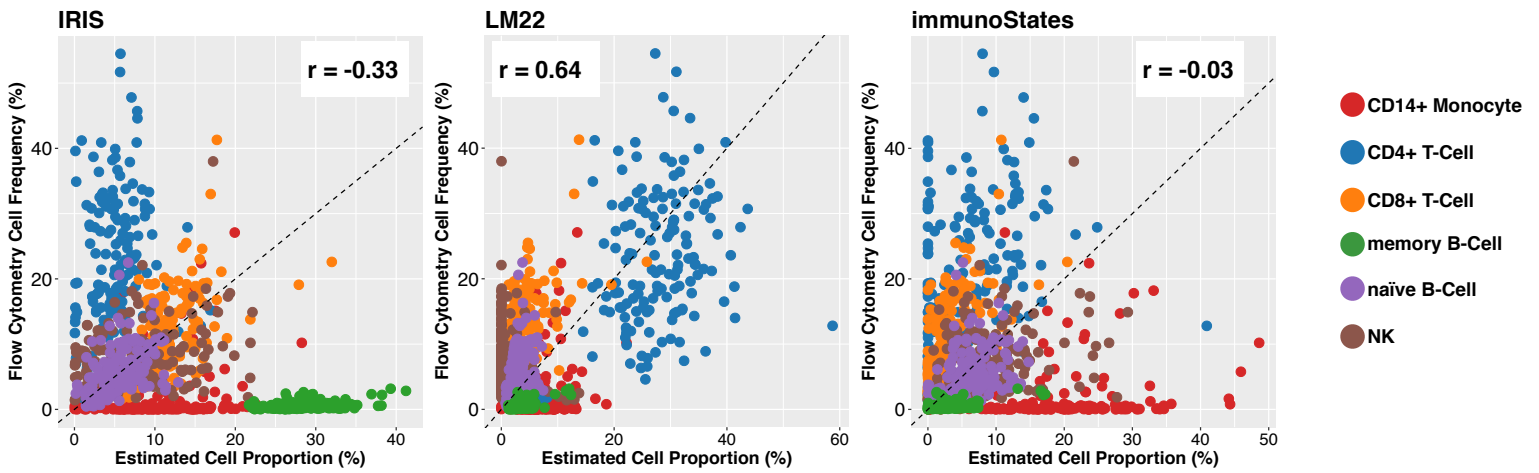

# Supplementary Figure 14

**Stanford-Ellison  
2011-2013  
PERT**

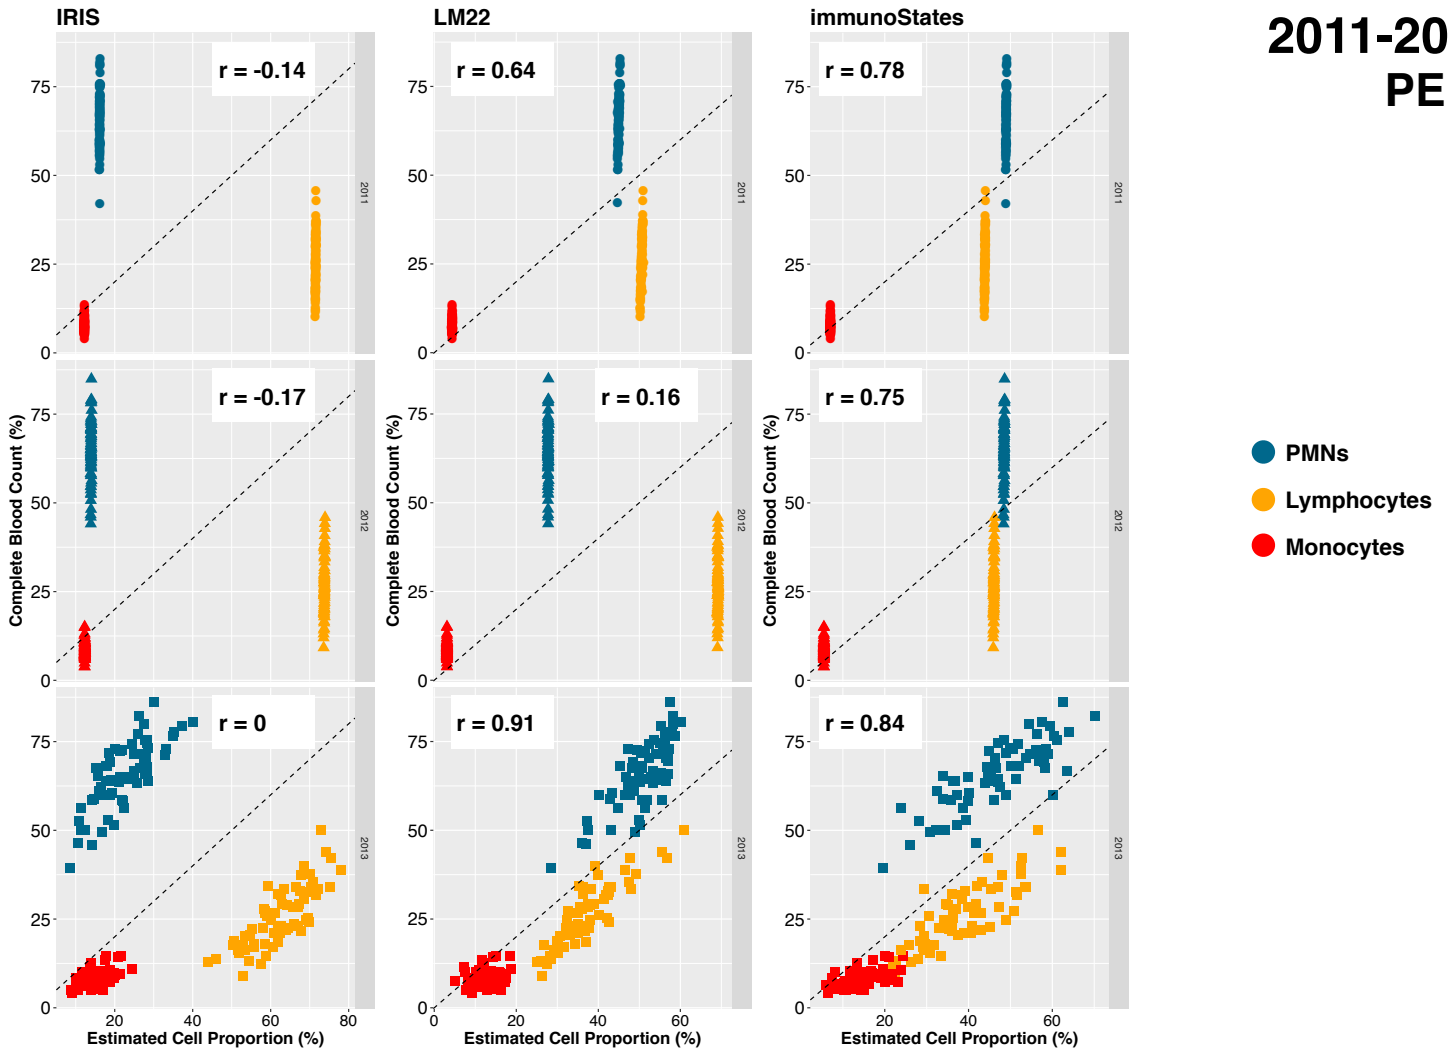

**Correlation plots between measured and estimated proportions.** (7) Correlation plots of estimated (x-axis) and measured cell proportions (y-axis) for each method and matrix combination for samples in GSE65133. Correlation is measured by Pearson's correlation coefficient. (8) Same as in (7) for GSE59654. (9,10,11) Same as in (7) for Stanford-Ellison 2011, 2012, and 2013 sample cohorts respectively. (12,13,14) Same as in previous figures but using the PERT method.

# Supplementary Figure 15

**a**

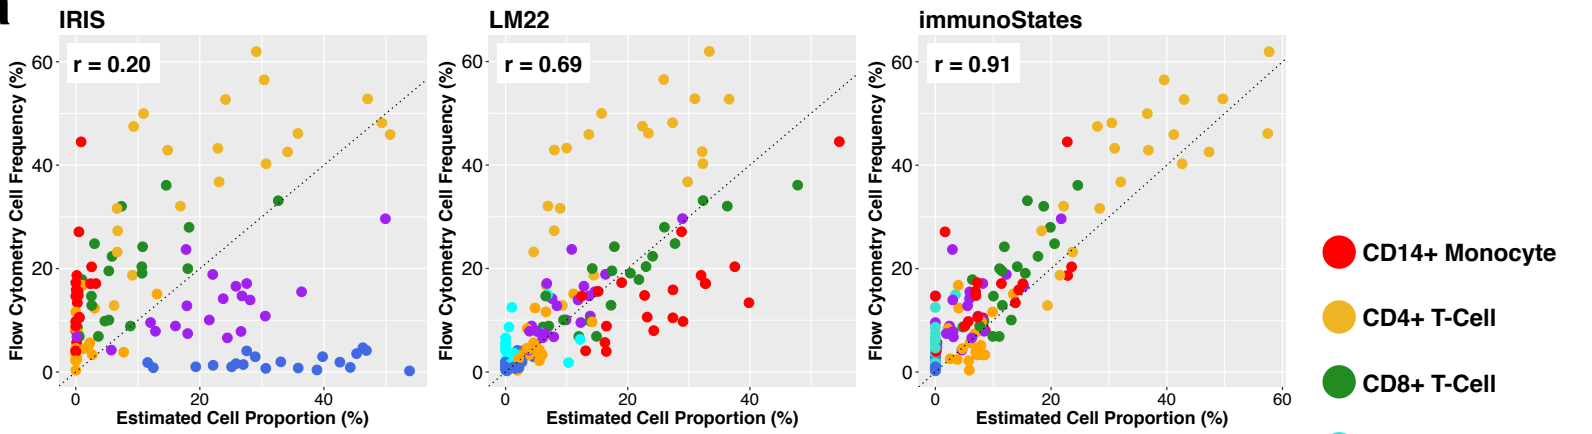

**b**

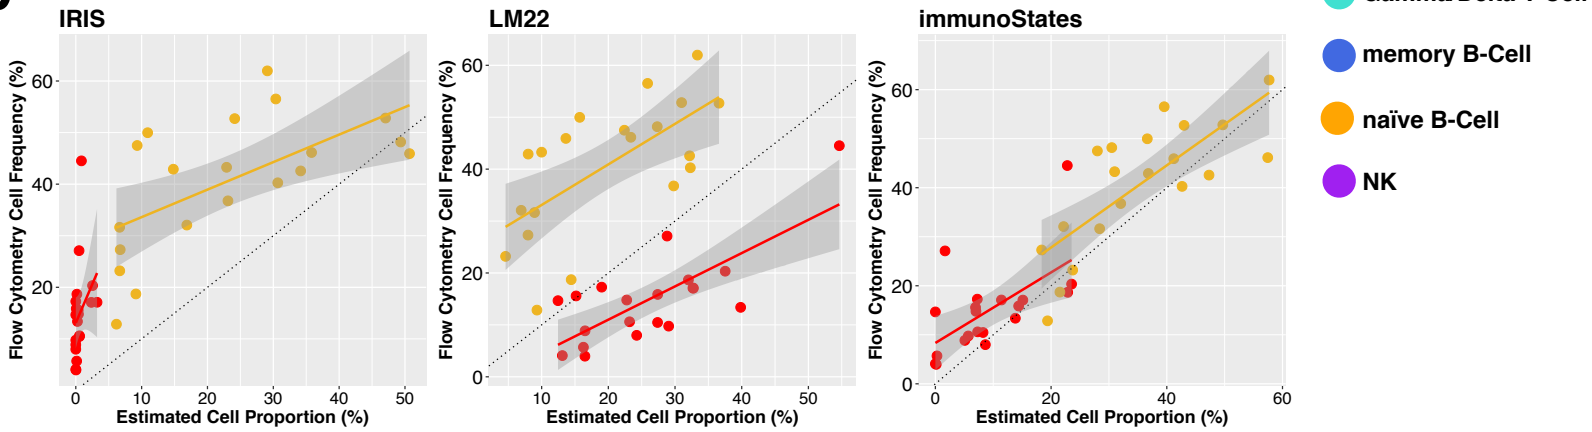

**Example of systematic under- and over-estimation of cell proportions in cell mixture deconvolution. (a)** Correlation plots of estimated (x-axis) and measured cell proportions (y-axis) in GSE65133 for all matrices using Support Vector Regression. **(b)** Highlighted CD4+ T-cell (yellow) and Monocyte (red) cell proportion estimates against measured values. Solid lines represent the best fit with a linear model, whereas the dashed line represent the 45-degree diagonal.



# Supplementary Figure 16

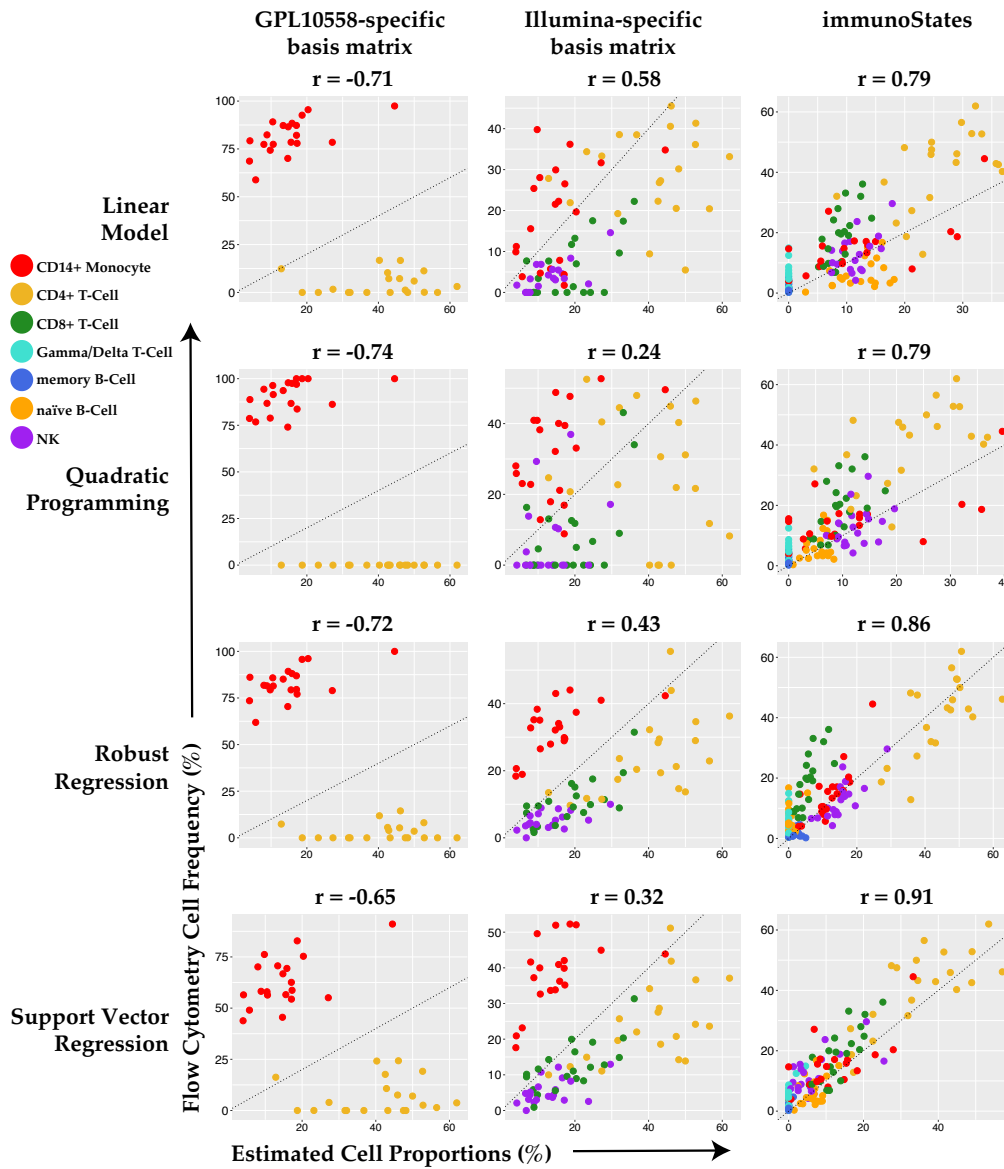

**Comparison of Illumina-specific basis matrices with immunoStates.** GPL10558-specific basis matrix, used in the first column, was created using only sorted immune cell gene expression profiles using GPL10558; Illumina-specific basis matrix, used in the second column, was created using sorted immune cell gene expression profiles using any Illumina microarrays; the third column used immunoStates for deconvolution. Irrespective of the method used, estimated cell proportions using immunoStates has higher correlation than both Illumina-specific basis matrices when deconvoluting GSE65133 that was generated using Illumina-based microarrays, GPL10558.

# Supplementary Table 1

| <b>Datasets used to measure platform bias</b> |                   |                     |                       |
|-----------------------------------------------|-------------------|---------------------|-----------------------|
| <b><i>GSE</i></b>                             | <b><i>GPL</i></b> | <b><i>Brand</i></b> | <b><i>Samples</i></b> |
| GSE38958                                      | GPL5175           | Affymetrix          | 115                   |
| GSE37912                                      | GPL5175           | Affymetrix          | 74                    |
| GSE21942                                      | GPL570            | Affymetrix          | 29                    |
| GSE19314                                      | GPL570            | Affymetrix          | 58                    |
| GSE22356                                      | GPL570            | Affymetrix          | 30                    |
| GSE55098                                      | GPL570            | Affymetrix          | 22                    |
| GSE17114                                      | GPL570            | Affymetrix          | 29                    |
| GSE17393                                      | GPL571            | Affymetrix          | 15                    |
| GSE23832                                      | GPL6244           | Affymetrix          | 12                    |
| GSE14577                                      | GPL96             | Affymetrix          | 15                    |
| GSE11907                                      | GPL96             | Affymetrix          | 122                   |
| GSE11909                                      | GPL96             | Affymetrix          | 115                   |
| GSE9006                                       | GPL96             | Affymetrix          | 105                   |
| GSE3365                                       | GPL96             | Affymetrix          | 68                    |
| GSE15573                                      | GPL6102           | Illumina            | 33                    |
| GSE18885                                      | GPL6104           | Illumina            | 127                   |
| GSE33463                                      | GPL6947           | Illumina            | 102                   |
