# Supplementary material for: Leveraging heterogeneity across multiple datasets increases cell-mixture deconvolution accuracy and reduces biological and technical biases
Source: PubMed Central journal article supplement (PMC6226523; doi:10.1038/s41467-018-07242-6), 2018-11-09
Supplement: 41467_2018_7242_MOESM3_ESM.pdf [file 41467_2018_7242_MOESM3_ESM.pdf]

## **Description of Additional Supplementary Files**

File Name: Supplementary Data 1

Description: Annotation table for gene expression datasets used to create immunoStates

File Name: Supplementary Data 2

Description: The immunoStates basis matrix
